# Supplementary material for: Metal–organic framework assisted synthesis of nitrogen-doped hollow carbon materials for enhanced supercapacitor performance
Source: Royal Society of Chemistry journal article supplement (doi:10.1039/c8nj02775g), 2018-01-01
Supplement: c8nj02775g1.pdf [file c8nj02775g1.pdf]

## Electronic Supplementary Information

### **Metal-organic framework assisted synthesis of nitrogen-doped hollow carbon materials for enhanced supercapacitor performance**

Xu Zhang,\* Qiuyu Fan, He Yang, Hongyan Xiao and Yonghou Xiao

*State Key Laboratory of Fine Chemicals, School of Petroleum and Chemical Engineering, Dalian University of Technology, Panjin 124221, China E-mail:*

*zhangxu@dlut.edu.cn;*

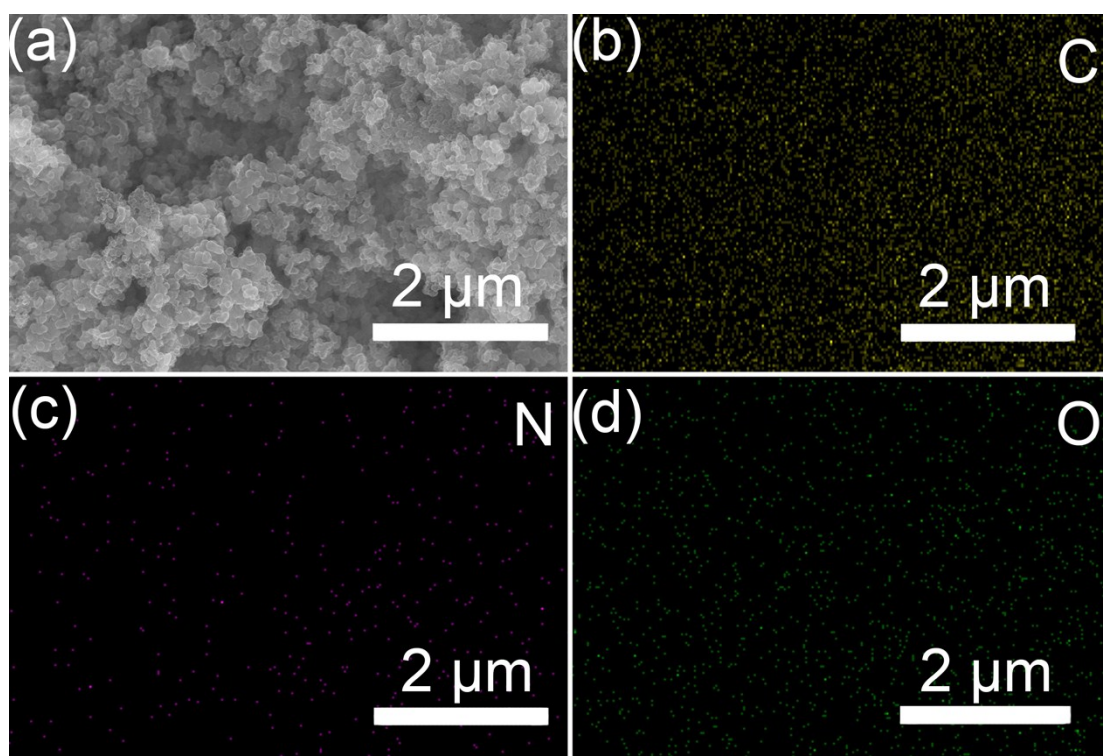

**Fig. S1** (a) SEM image of ZIF-8@PDA-C and the corresponding EDS element mapping of (b) C; (c) N and (d) O.

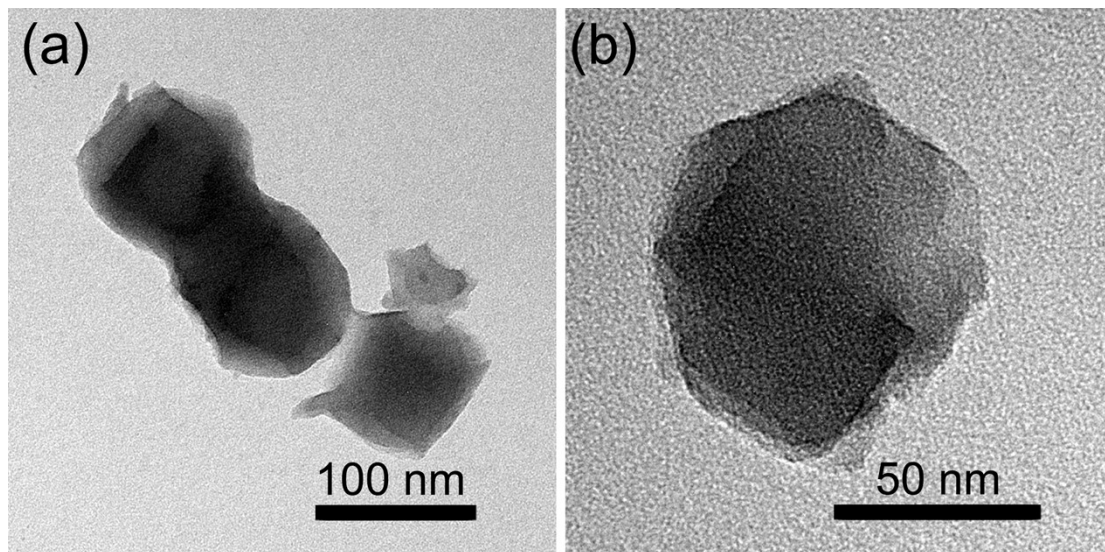

Fig. S2 TEM images of ZIF-8-C.

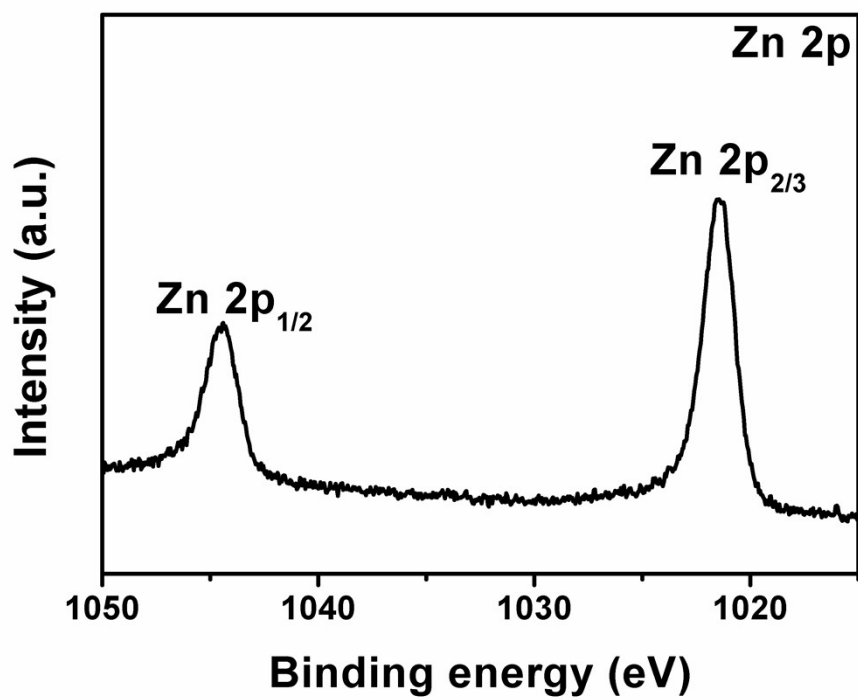

Fig. S3 Zn 2p XPS spectra of ZIF-8@PDA-C.

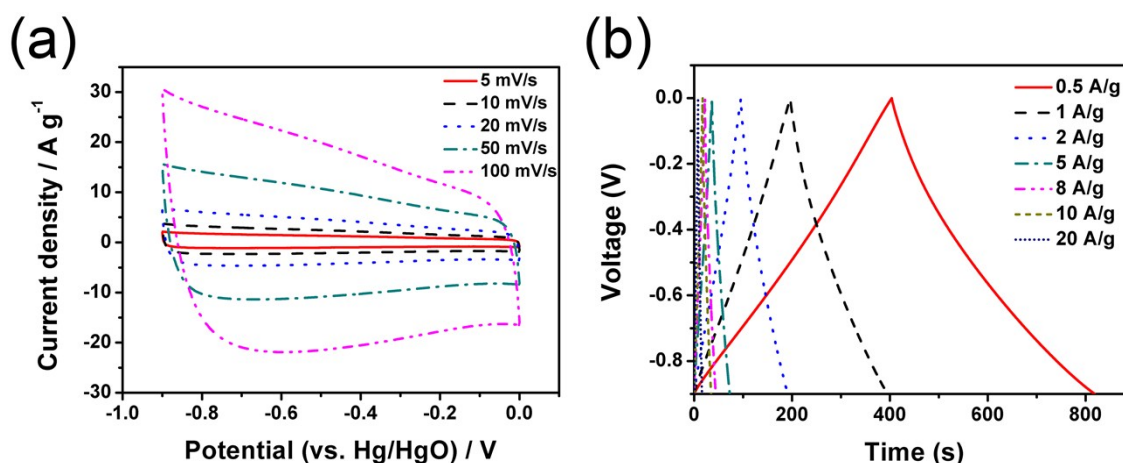

**Fig. S4** (a) Cyclic voltammograms of ZIF-8@PDA-C at different scan rates. (b) Galvanostatic charge-discharge curves of ZIF-8@PDA-C at different current densities.

Table S1 Capacitances of the representative nanoporous carbons in aqueous electrolytes

| NO. | sample       | Electrolyte                       | Current density (A g <sup>-1</sup> ) | Scan rate (mV s <sup>-1</sup> ) | Specific capacitance (F g <sup>-1</sup> ) | References |
|-----|--------------|-----------------------------------|--------------------------------------|---------------------------------|-------------------------------------------|------------|
| 1.  | ZIF-8@PDA-C  | 6 M KOH                           | 0.2                                  | -                               | 253                                       | This work  |
| 2   | Carbon-ZS    | 6 M KOH                           | 0.1                                  | -                               | 285                                       | 1          |
| 3   | NPC          | 1M H <sub>2</sub> SO <sub>4</sub> | 0.25                                 | -                               | 258                                       | 2          |
| 4   | Carbon-L-950 | 6 M KOH                           | 0.2                                  | -                               | 226.2                                     | 3          |
| 5   | NPC          | 1M H <sub>2</sub> SO <sub>4</sub> | -                                    | 5                               | 252                                       | 4          |
| 6   | NPC800       | 1M H <sub>2</sub> SO <sub>4</sub> | 0.1                                  | -                               | 127                                       | 5          |
| 7   | PCM-K        | 6 M KOH                           | 0.1                                  | -                               | 376.2                                     | 6          |
| 8   | PK           | 6 M KOH                           | 0.1                                  | -                               | 255.2                                     | 6          |
| 9   | C800         | 1M H <sub>2</sub> SO <sub>4</sub> | 0.25                                 | -                               | 200                                       | 7          |
| 10  | MC-Al        | 30 wt% KOH                        | 0.1                                  | -                               | 232.8                                     | 8          |
| 11  | CIRMOF-3-950 | 1M H <sub>2</sub> SO <sub>4</sub> | -                                    | 5                               | 239                                       | 9          |

## References

1. S. Zhong, C. Zhan and D. Cao, *Carbon*, 2015, **85**, 51-59.
2. B. Liu, H. Shioyama, T. Akita and Q. Xu, *J. Am. Chem. Soc.*, 2008, **130**, 13333-13337.
3. P. Zhang, F. Sun, Z. Shen and D. Cao, *J. Mater. Chem. A*, 2014, **2**, 12873-12880.
4. R. R. Salunkhe, Y. Kamachi, N. L. Torad, S. M. Hwang, Z. Sun, S. X. Dou, J. H. Kim and Y. Yamauchi, *J. Mater. Chem. A*, 2014, **2**, 19848-19854.
5. B. Liu, H. Shioyama, H. Jiang, X. Zhang and Q. Xu, *Carbon*, 2010, **48**, 456-463.
6. Y. H. Lijuan Lv, Dapeng Cao, *Appl. Surf. Sci.*, 2018, **456**, 184-194.
7. H.-L. Jiang, B. Liu, Y.-Q. Lan, K. Kuratani, T. Akita, H. Shioyama, F. Zong and Q. Xu, *J. Am. Chem. Soc.*, 2011, **133**, 11854-11857.
8. X. Yan, X. Li, Z. Yan and S. Komarneni, *Appl. Surf. Sci.*, 2014, **308**, 306-310.
9. J.-W. Jeon, R. Sharma, P. Meduri, B. W. Arey, H. T. Schaef, J. L. Lutkenhaus, J. P. Lemmon, P. K. Thallapally, M. I. Nandasiri, B. P. McGrail and S. K. Nune, *ACS Appl. Mater. Inter.*, 2014, **6**, 7214-7222.
